# Supplementary material
Source: PubMed Central journal article supplement (PMC2630413)
Supplement: NIHMS86860-supplement-01.pdf [file NIHMS86860-supplement-01.pdf]

**Supplementary Table 1. Pooled relative risks (RRs) and 95% confidence intervals (CIs) for combined *GSTM1*, *GSTT1*, or *NAT2* genotype and regular genital talc use history and ovarian cancer risk in the New England Case-Control Study (NECC) and the Nurses' Health Study (NHS)\*†**

|                                           | Total epithelial ovarian cancer |                |                        | Serous invasive ovarian cancer |                |                        |
|-------------------------------------------|---------------------------------|----------------|------------------------|--------------------------------|----------------|------------------------|
|                                           | No regular talc                 | Regular talc   | <i>P</i> -interaction‡ | No regular talc                | Regular talc   | <i>P</i> -interaction‡ |
| <i>GSTM1</i>                              |                                 |                |                        |                                |                |                        |
| <i>GSTM1</i> present (+)                  | 1.0 (ref.)                      | 1.6 (1.2, 2.1) |                        | 1.0 (ref.)                     | 2.0 (1.5, 2.8) |                        |
| Cases/controls                            | 480/646                         | 189/165        |                        | 173/546                        | 90/135         |                        |
| <i>GSTM1</i> null (-)                     | 1.0 (0.8, 1.1)                  | 1.2 (0.9, 1.5) | 0.13                   | 1.1 (0.8, 1.3)                 | 1.4 (1.0, 2.0) | 0.05                   |
| Cases/controls                            | 498/690                         | 179/198        |                        | 190/566                        | 76/165         |                        |
| <i>GSTT1</i>                              |                                 |                |                        |                                |                |                        |
| <i>GSTT1</i> present (+)                  | 1.0 (ref.)                      | 1.2 (1.0, 1.5) |                        | 1.0 (ref.)                     | 1.5 (1.2, 2.0) |                        |
| Cases/controls                            | 785/1035                        | 278/301        |                        | 288/867                        | 129/247        |                        |
| <i>GSTT1</i> null (-)                     | 0.9 (0.7, 1.1)                  | 1.7 (1.2, 2.4) | 0.03                   | 0.9 (0.6, 1.2)                 | 1.9 (1.2, 2.9) | 0.17                   |
| Cases/controls                            | 194/300                         | 87/67          |                        | 71/246                         | 38/57          |                        |
| <i>NAT2</i>                               |                                 |                |                        |                                |                |                        |
| <i>NAT2</i> rapid/intermediate acetylator | 1.0 (ref.)                      | 1.5 (1.1, 2.1) |                        | 1.0 (ref.)                     | 1.9 (1.2, 2.8) |                        |
| Cases/controls                            | 330/459                         | 128/113        |                        | 123/393                        | 57/92          |                        |
| <i>NAT2</i> slow acetylator               | 0.9 (0.6, 1.2)                  | 1.1 (0.6, 1.9) | 0.60                   | 0.9 (0.7, 1.2)                 | 1.4 (1.0, 2.0) | 0.57                   |
| Cases/controls                            | 552/819                         | 217/233        |                        | 204/661                        | 96/192         |                        |
| <i>GSTM1</i> / <i>GSTT1</i> genotype      |                                 |                |                        |                                |                |                        |
| <i>GSTM1</i> +, <i>GSTT1</i> +            | 1.0 (ref.)                      | 1.4 (1.0, 1.9) |                        | 1.0 (ref.)                     | 1.8 (1.2, 2.6) |                        |
| Cases/controls                            | 378/479                         | 142/140        |                        | 136/406                        | 68/112         |                        |
| <i>GSTM1</i> -, <i>GSTT1</i> +            | 0.9 (0.8, 1.1)                  | 1.0 (0.8, 1.4) |                        | 1.0 (0.8, 1.3)                 | 1.3 (0.9, 1.9) |                        |
| Cases/controls                            | 400/541                         | 135/154        |                        | 151/454                        | 60/131         |                        |
| <i>GSTM1</i> +, <i>GSTT1</i> -            | 0.8 (0.6, 1.1)                  | 2.6 (1.1, 6.1) |                        | 0.8 (0.5, 1.2)                 | 2.7 (1.4, 5.2) |                        |
| Cases/controls                            | 98/158                          | 47/24          |                        | 34/135                         | 22/23          |                        |
| <i>GSTM1</i> -, <i>GSTT1</i> -            | 0.8 (0.5, 1.2)                  | 1.2 (0.7, 2.2) | 0.03                   | 0.9 (0.6, 1.5)                 | 1.4 (0.7, 2.6) | 0.10                   |
| Cases/controls                            | 94/138                          | 40/41          |                        | 36/108                         | 16/33          |                        |

\*Unconditional (NECC) and conditional (NHS) logistic regression adjusted for age, study center (NECC only), duration of oral contraceptive use (months), parity (continuous), tubal ligation, body mass index (kg/m<sup>2</sup>, continuous), and duration of postmenopausal hormone use (months)

†*P*-values for tests for heterogeneity comparing the NECC and NHS results were all >0.22, except the *p*-values for the *NAT2* slow acetylator genotype and risk of total ovarian cancer, which were >0.08

‡*P*-values for interaction based on likelihood ratio test comparing unconditional logistic regression models with and without gene-talc interaction terms
